# Supplementary material for: Synthesis, X-ray structure, spectral and electrochemical properties of a β-meso covalently linked BODIPY–Ru(ii) dipyrrin complex
Source: Royal Society of Chemistry journal article supplement (doi:10.1039/c4nj01114g), 2014-09-11
Supplement: c4nj01114g1.pdf [file c4nj01114g1.pdf]

## Supporting Information

### Synthesis, X-ray Structure, Spectral and Electrochemical Properties of $\beta$ -*meso* Covalently Linked BODIPY-Ru(II) Dipyrrin Complex

Sheri Madhu, Sunit Kumar, Tamal Chatterjee and Mangalampalli Ravikanth\*

Department of Chemistry, Indian Institute of Technology Bombay, Powai,  
Mumbai 400 076, India. E-mail: [ravikanth@chem.iitb.ac.in](mailto:ravikanth@chem.iitb.ac.in)

| Entry | Contents                                                                                             | Page no   |
|-------|------------------------------------------------------------------------------------------------------|-----------|
| 1     | <b>Figure S1.</b> HR mass spectrum of BODIPY <b>3</b>                                                | <b>3</b>  |
| 2     | <b>Figure S2.</b> $^1\text{H}$ NMR spectrum of BODIPY <b>3</b> in $\text{CDCl}_3$                    | <b>4</b>  |
| 3     | <b>Figure S3.</b> $^{13}\text{C}$ NMR spectrum of BODIPY <b>3</b> in $\text{CDCl}_3$                 | <b>5</b>  |
| 4     | <b>Figure S4.</b> $^{19}\text{F}$ NMR spectrum of BODIPY <b>3</b> in $\text{CDCl}_3$                 | <b>6</b>  |
| 5     | <b>Figure S5.</b> $^{11}\text{B}$ NMR spectrum of BODIPY <b>3</b> in $\text{CDCl}_3$                 | <b>7</b>  |
| 6     | <b>Figure S6.</b> $^1\text{H}$ - $^1\text{H}$ COSY spectrum of compound <b>3</b> in $\text{CDCl}_3$  | <b>8</b>  |
| 7     | <b>Figure S7.</b> HR mass spectrum of BODIPY <b>4</b>                                                | <b>9</b>  |
| 8     | <b>Figure S8.</b> $^1\text{H}$ NMR spectrum of BODIPY <b>4</b> in $\text{CDCl}_3$                    | <b>10</b> |
| 9     | <b>Figure S9.</b> $^{13}\text{C}$ NMR spectrum of BODIPY <b>4</b> in $\text{CDCl}_3$                 | <b>11</b> |
| 10    | <b>Figure S10.</b> $^{19}\text{F}$ NMR spectrum of BODIPY <b>4</b> in $\text{CDCl}_3$                | <b>12</b> |
| 11    | <b>Figure S11.</b> $^{11}\text{B}$ NMR spectrum of BODIPY <b>4</b> in $\text{CDCl}_3$                | <b>13</b> |
| 12    | <b>Figure S12.</b> $^1\text{H}$ - $^1\text{H}$ NOESY spectrum BODIPY <b>4</b> in $\text{CDCl}_3$     | <b>14</b> |
| 13    | <b>Figure S13.</b> $^1\text{H}$ - $^1\text{H}$ COSY spectrum of compound <b>4</b> in $\text{CDCl}_3$ | <b>15</b> |
| 14    | <b>Figure S14.</b> HR mass spectrum of BODIPY <b>1</b>                                               | <b>16</b> |
| 15    | <b>Figure S15.</b> $^1\text{H}$ NMR spectrum of BODIPY <b>1</b> in $\text{CDCl}_3$                   | <b>17</b> |
| 16    | <b>Figure S16.</b> $^{13}\text{C}$ NMR spectrum of BODIPY <b>1</b> in $\text{CDCl}_3$                | <b>18</b> |
| 17    | <b>Figure S17.</b> $^{19}\text{F}$ NMR spectrum of BODIPY <b>1</b> in $\text{CDCl}_3$                | <b>19</b> |
| 18    | <b>Figure S18.</b> $^{11}\text{B}$ NMR spectrum of BODIPY <b>1</b> in $\text{CDCl}_3$                | <b>20</b> |

|    |                                                                                                      |           |
|----|------------------------------------------------------------------------------------------------------|-----------|
| 19 | <b>Figure S19.</b> $^1\text{H}$ - $^1\text{H}$ COSY spectrum of compound <b>1</b> in $\text{CDCl}_3$ | <b>21</b> |
| 20 | <b>Figure S20.</b> $^1\text{H}$ - $^1\text{H}$ COSY spectrum of compound <b>1</b> in $\text{CDCl}_3$ | <b>22</b> |
| 21 | <b>Figure S21.</b> $^1\text{H}$ - $^1\text{H}$ NOESY spectrum BODIPY <b>1</b> in $\text{CDCl}_3$     | <b>23</b> |
| 22 | <b>Figure S22.</b> Absorption, emission spectra of <b>4</b> in different solvents                    | <b>24</b> |
| 23 | <b>Figure S23.</b> Absorption, emission spectra of <b>1</b> in different solvents                    | <b>25</b> |
| 24 | <b>Figure S24.</b> Cyclic voltammogram of <b>4</b> recorded in $\text{CH}_2\text{Cl}_2$              | <b>26</b> |
| 25 | <b>Figure S25.</b> Cyclic voltammogram of <b>1</b> recorded in $\text{CH}_2\text{Cl}_2$              | <b>27</b> |
| 26 | <b>Figure S26.</b> Comparison of reduction waves of BODIPYs <b>1</b> and <b>4</b>                    | <b>28</b> |

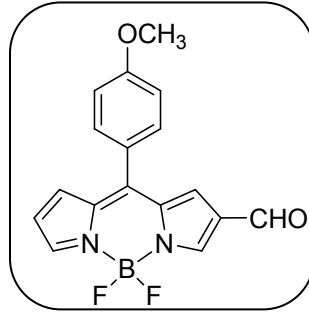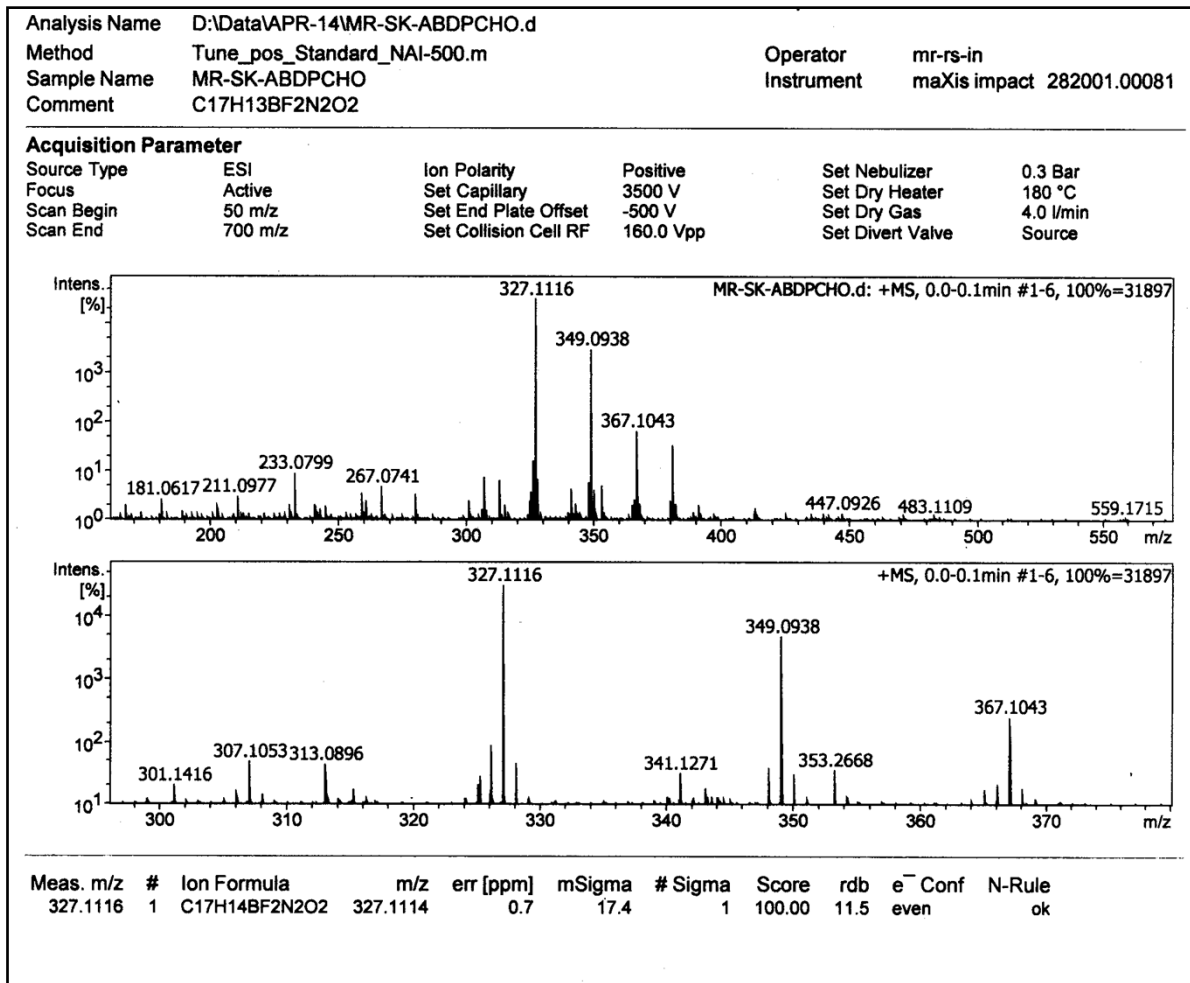

Figure S1: HR mass spectrum of BODIPY 3

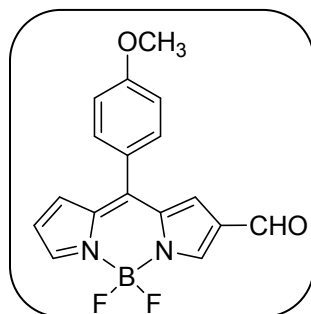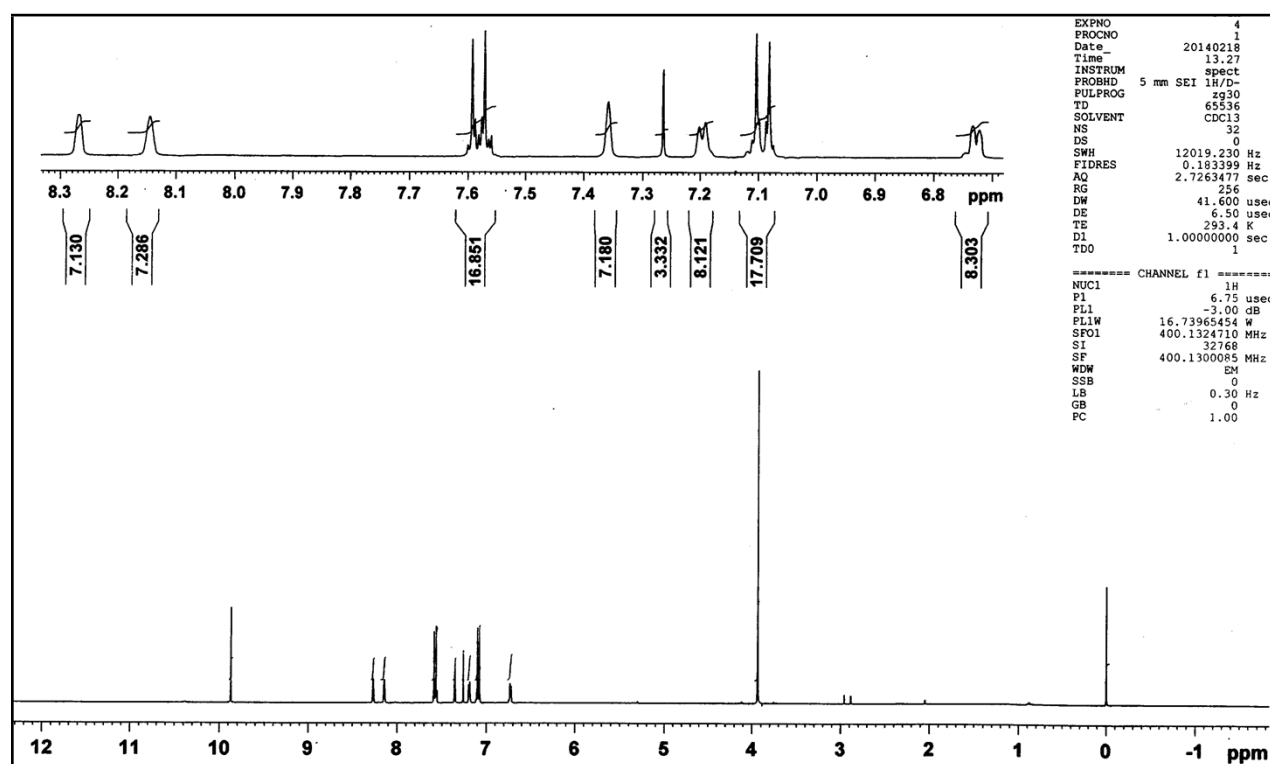

Figure S2:  $^1\text{H}$  NMR spectrum of BODIPY 3 recorded in  $\text{CDCl}_3$

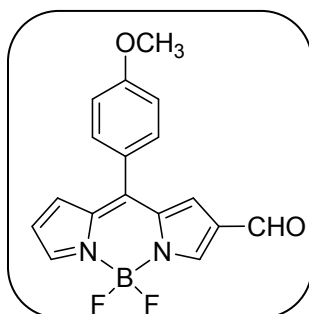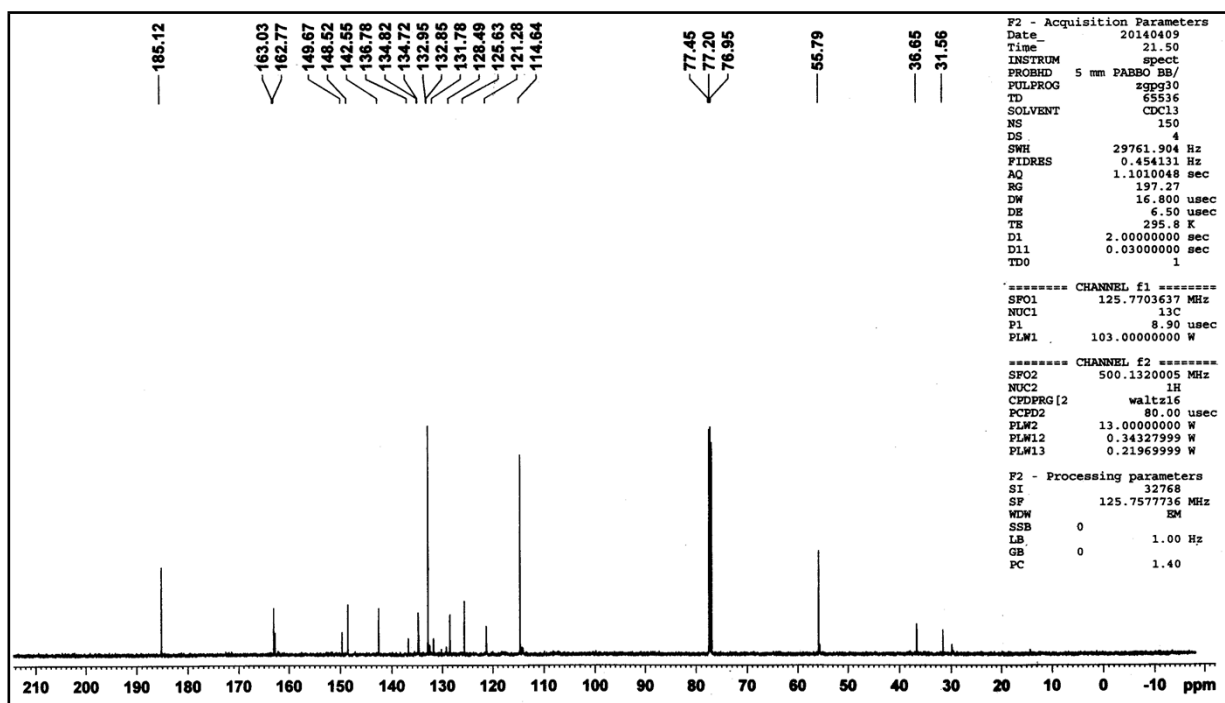

Figure S3:  $^{13}\text{C}$  NMR spectrum of BODIPY 3 recorded in  $\text{CDCl}_3$

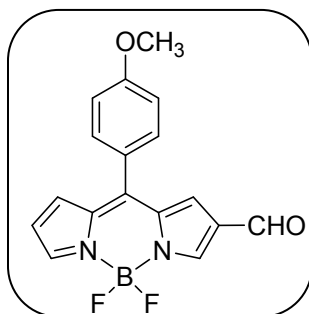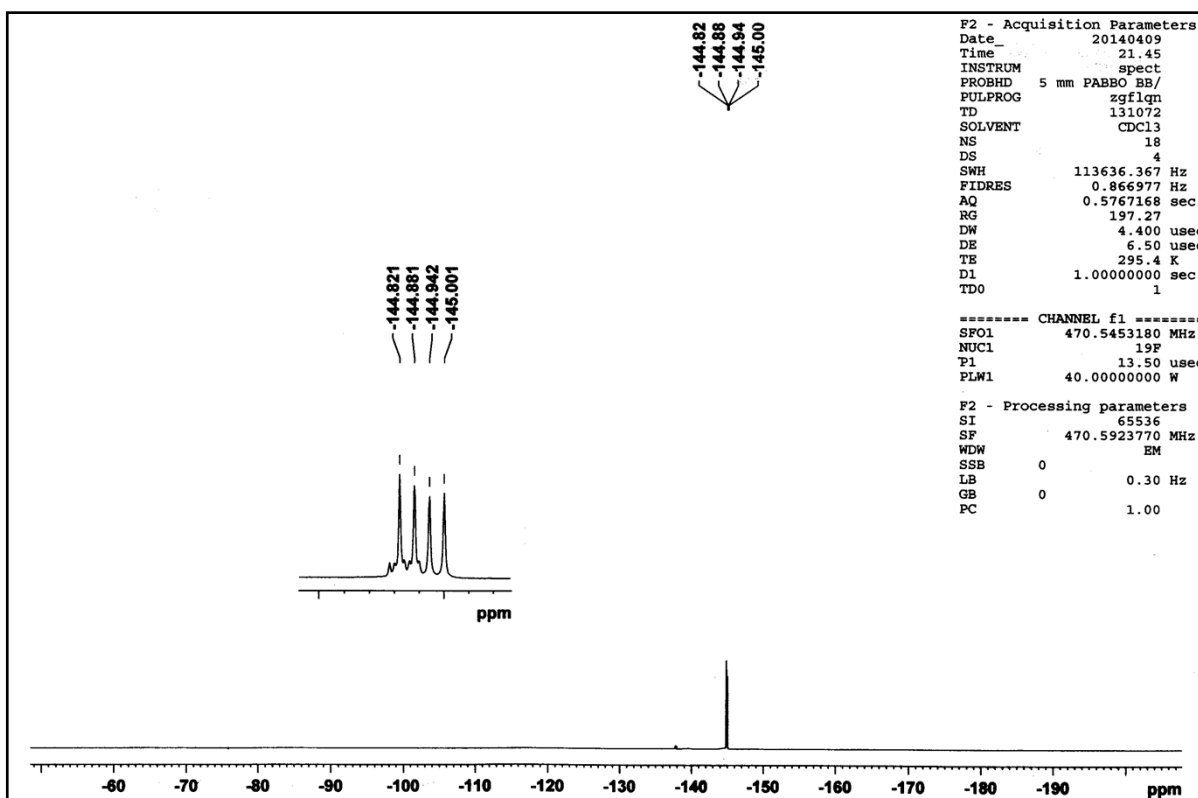

**Figure S4:**  $^{19}\text{F}$  NMR spectrum of BODIPY 3 recorded in  $\text{CDCl}_3$ . Inset shows the expansion

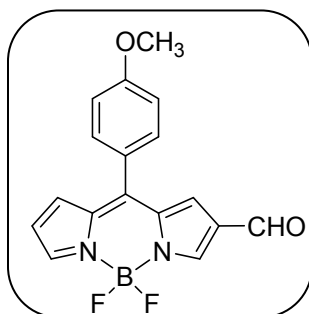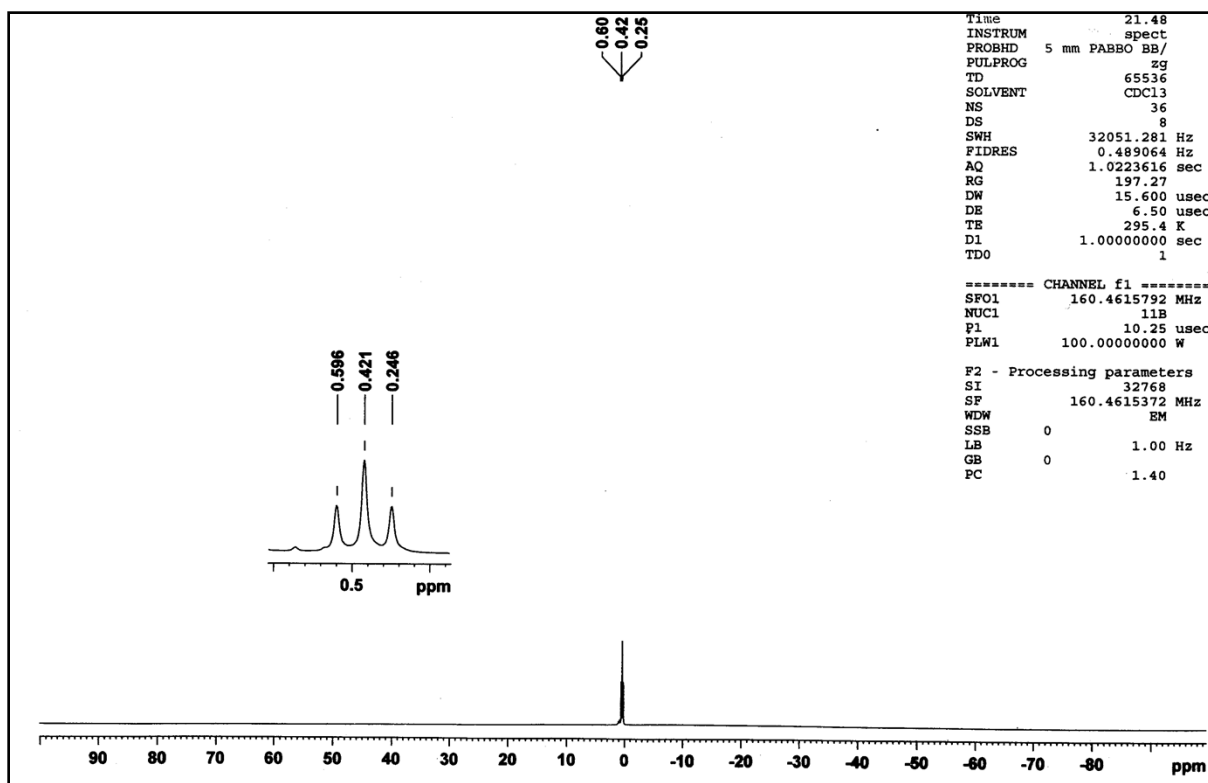

**Figure S5:**  $^{11}\text{B}$  NMR spectrum of BODIPY **3** recorded in  $\text{CDCl}_3$ . Inset shows the expansion.

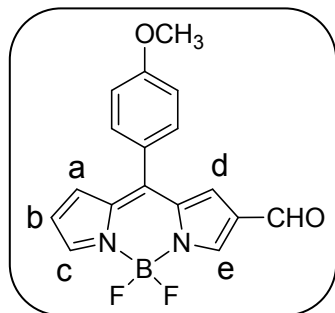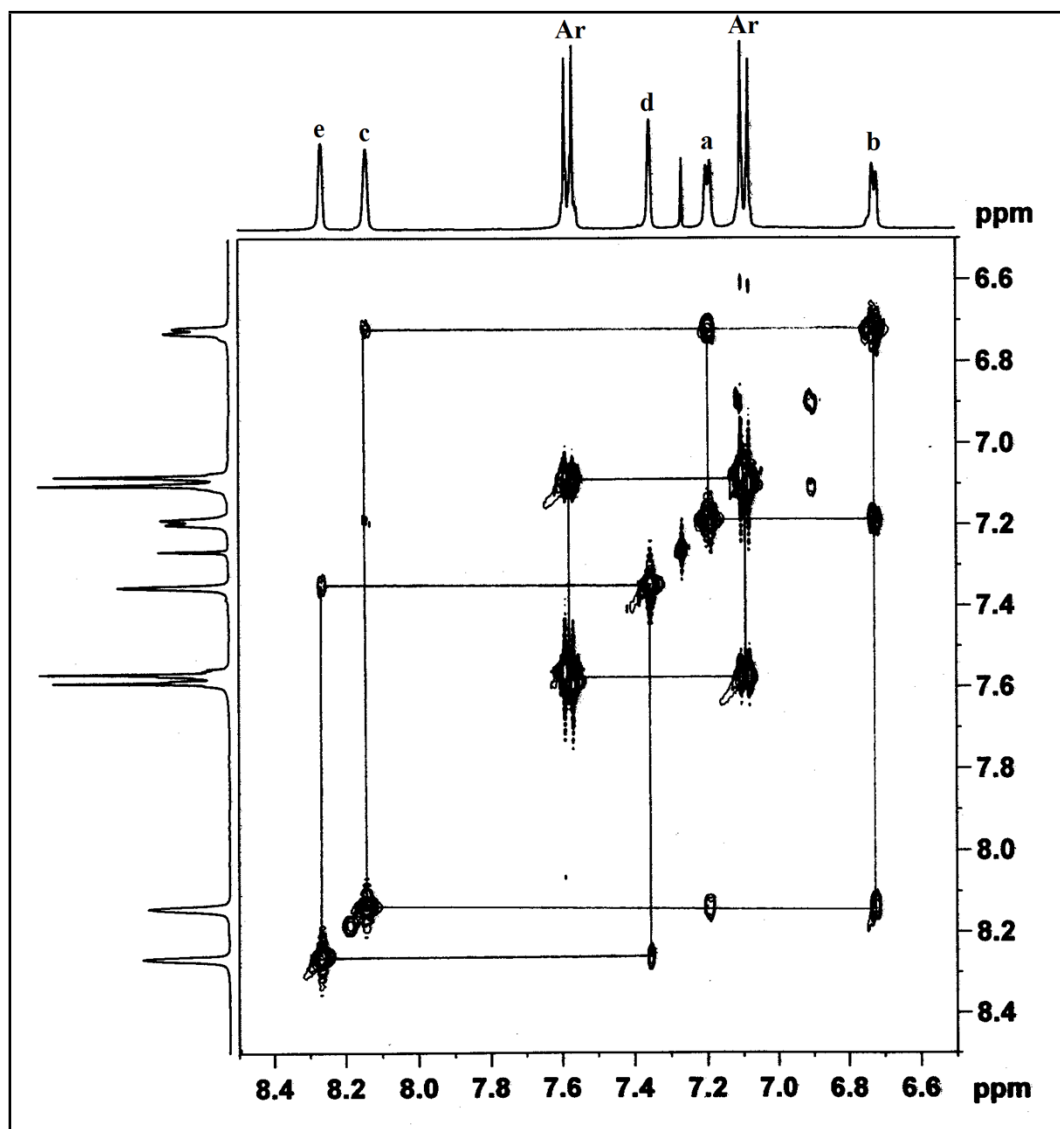

Figure S6: Partial <sup>1</sup>H-<sup>1</sup>H COSY spectrum of BODIPY 3 recorded in CDCl<sub>3</sub>.



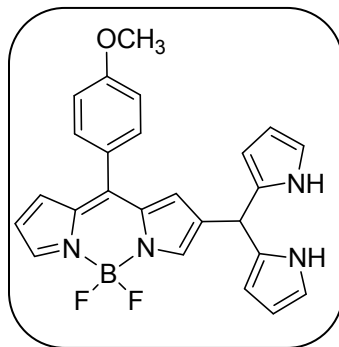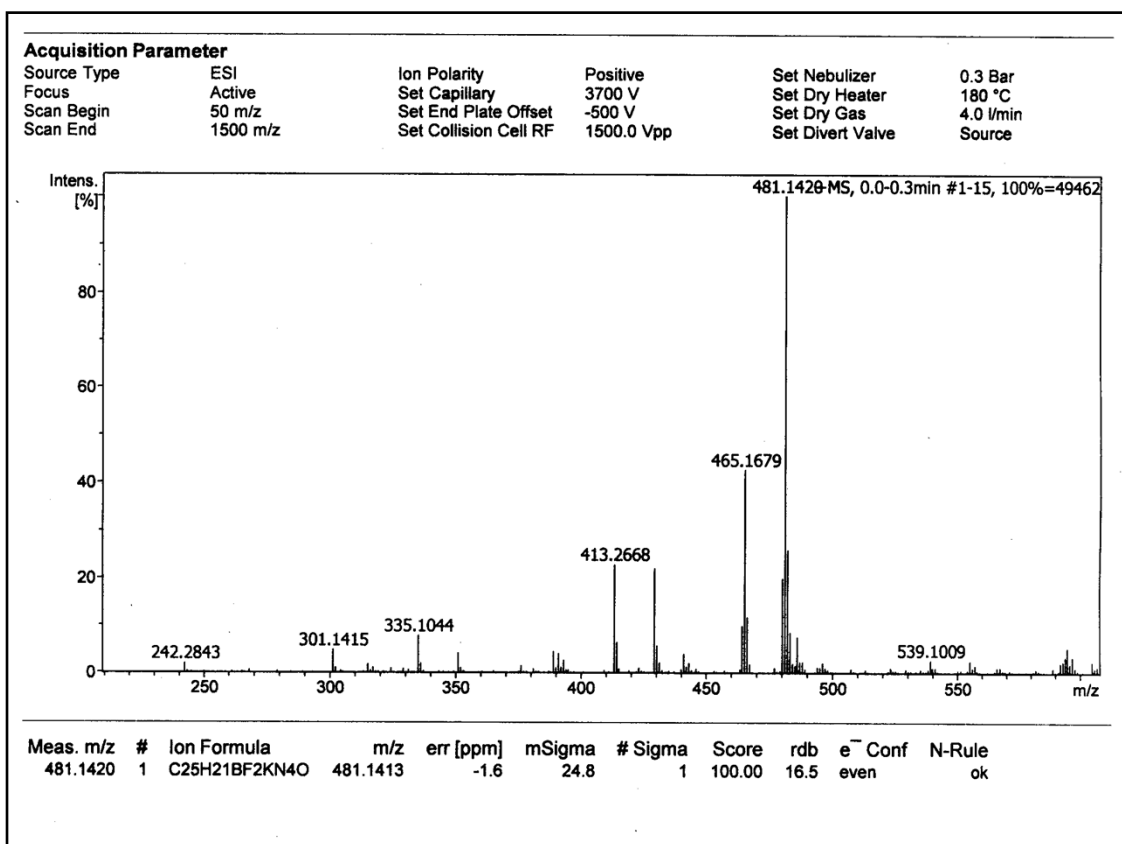

Figure S7: HR mass spectrum of BODIPY 4

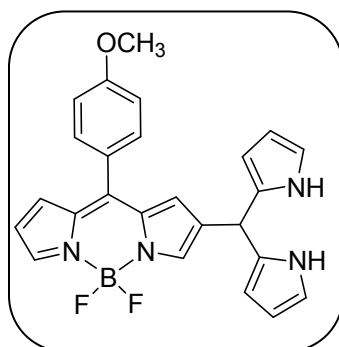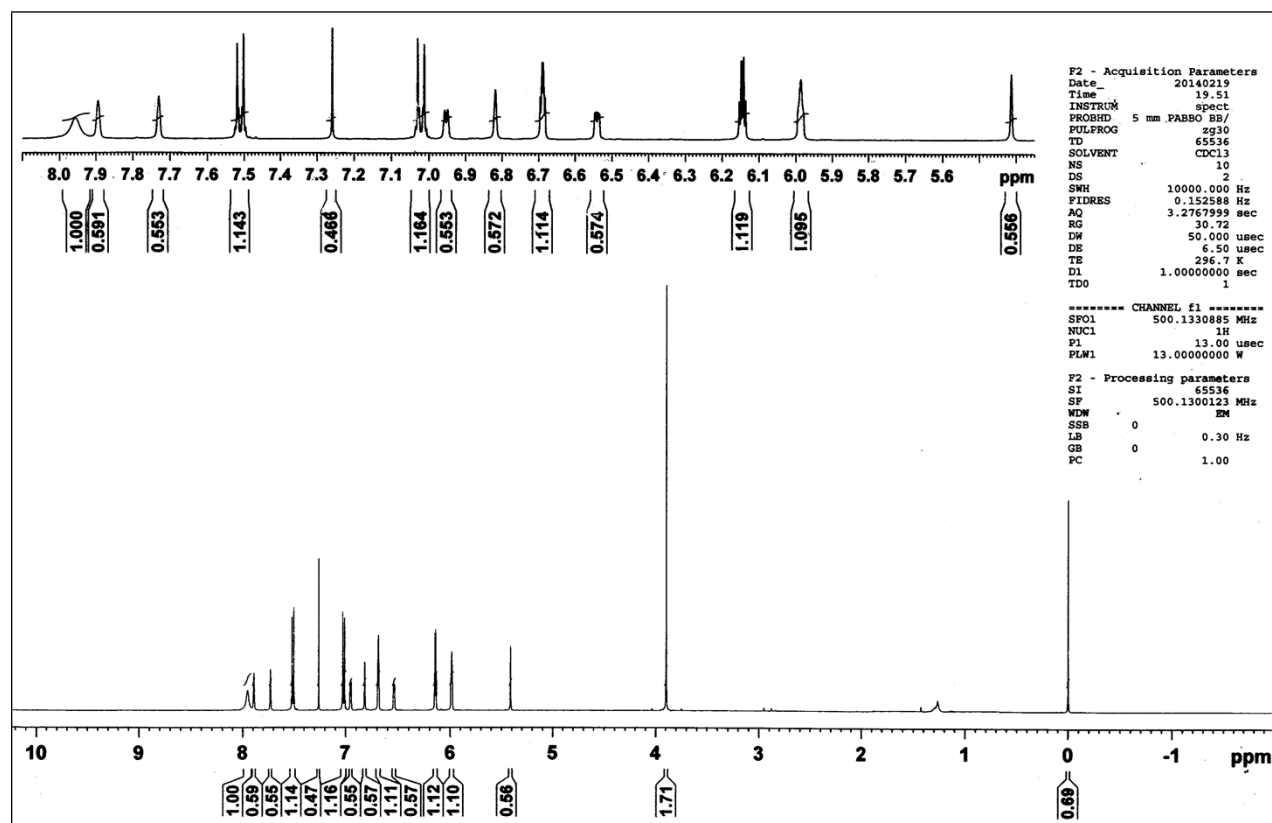

Figure S8: <sup>1</sup>H NMR spectrum of BODIPY 4 recorded in CDCl<sub>3</sub>

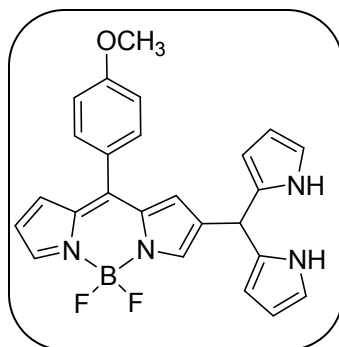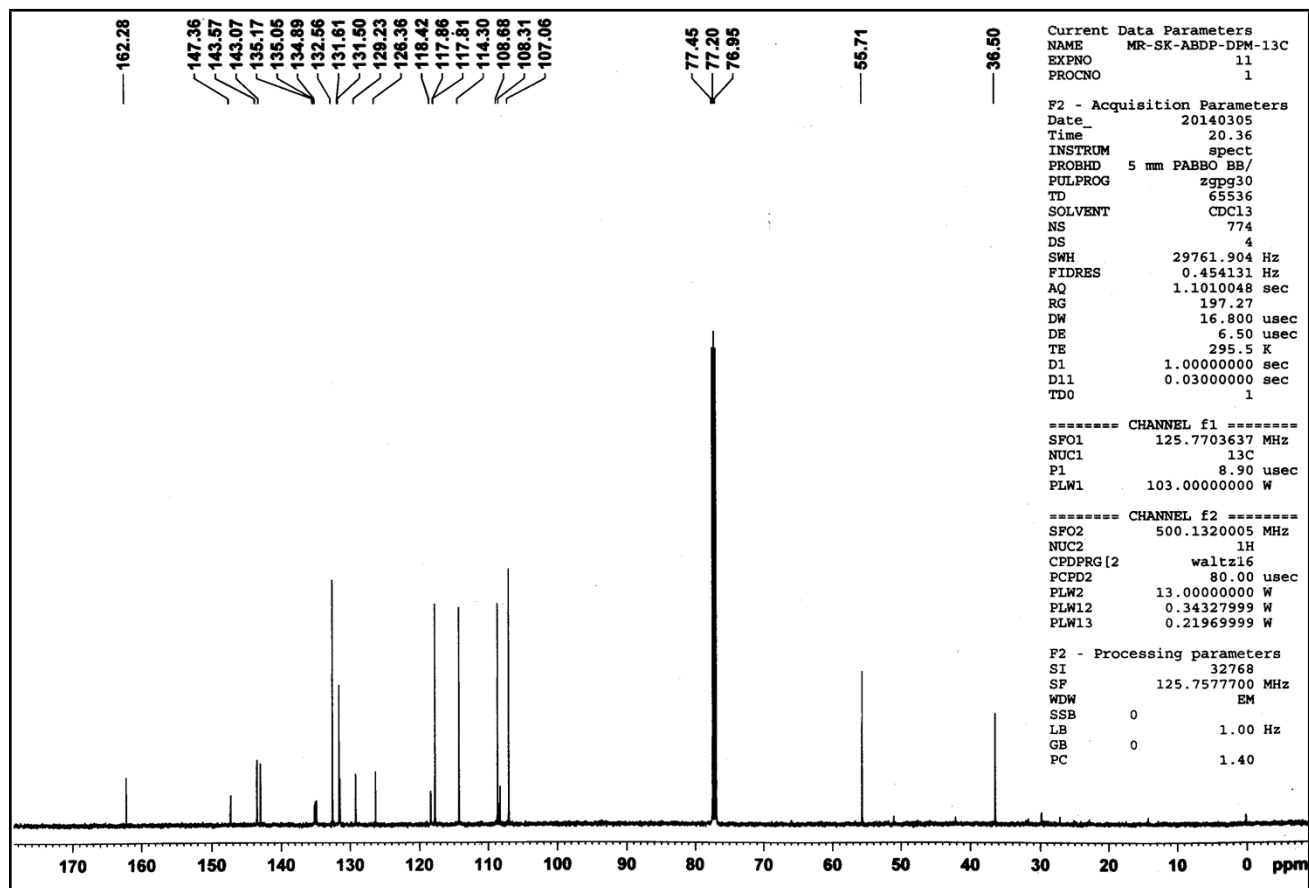

Figure S9:  $^{13}\text{C}$  NMR spectrum of BODIPY 4 recorded in  $\text{CDCl}_3$

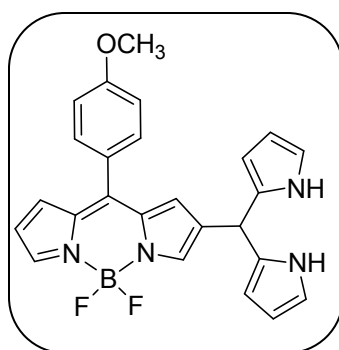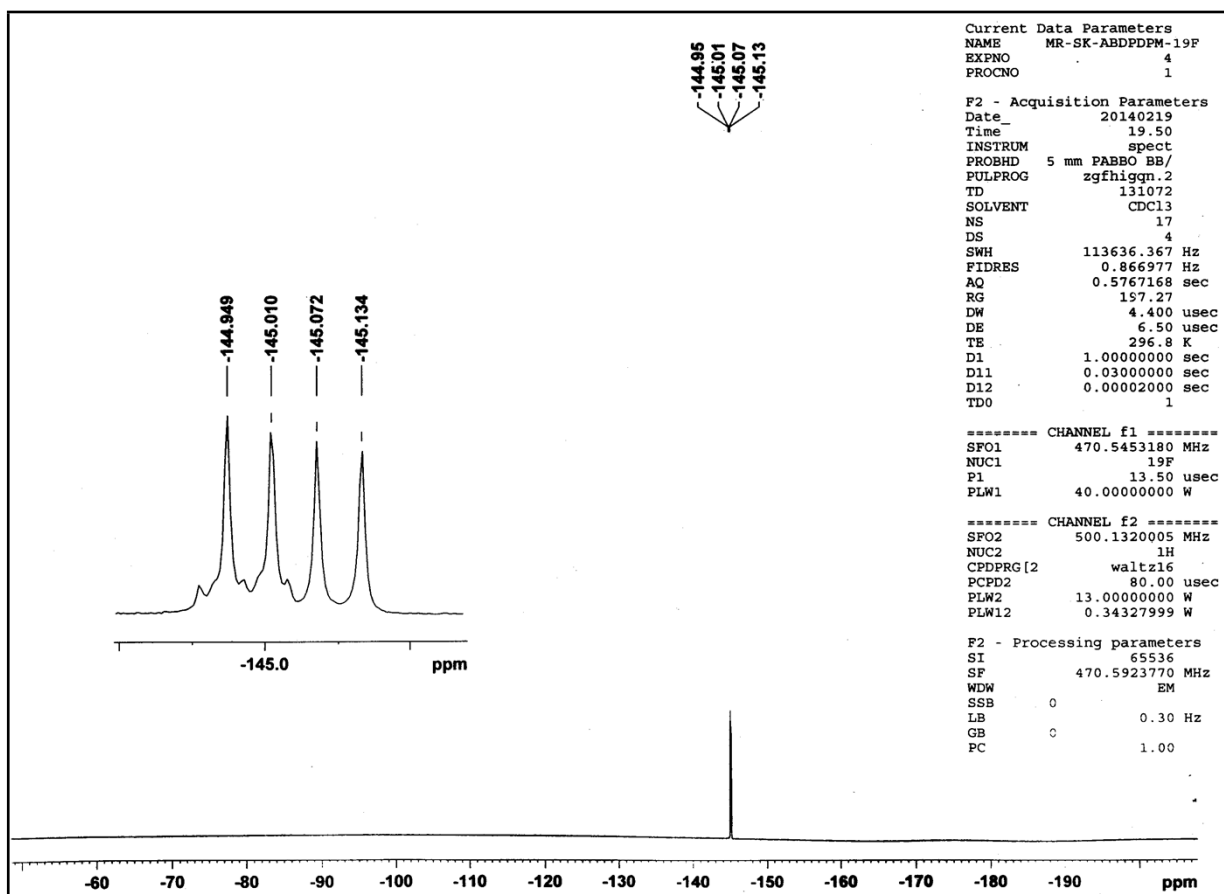

Figure S10:  $^{19}\text{F}$  NMR spectrum of BODIPY 4 recorded in  $\text{CDCl}_3$ . Inset shows the expansion.

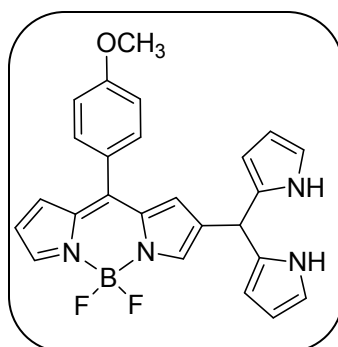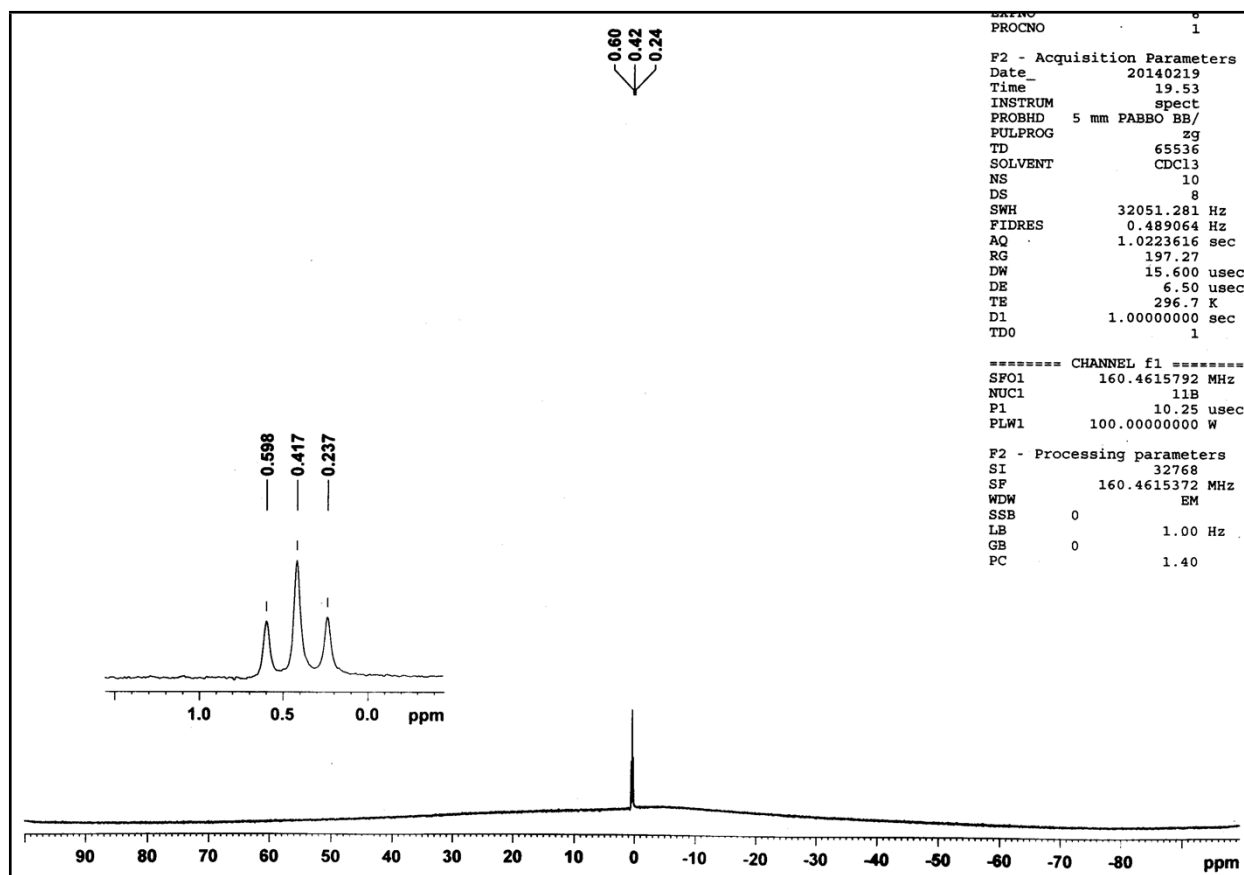

**Figure S11:**  $^{11}\text{B}$  NMR spectrum of BODIPY 4 recorded in  $\text{CDCl}_3$ . Inset shows the expansion

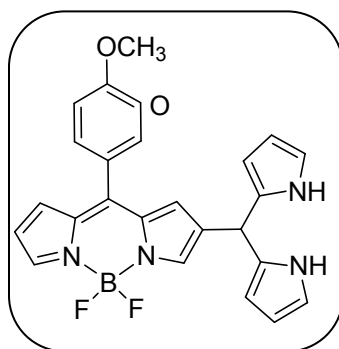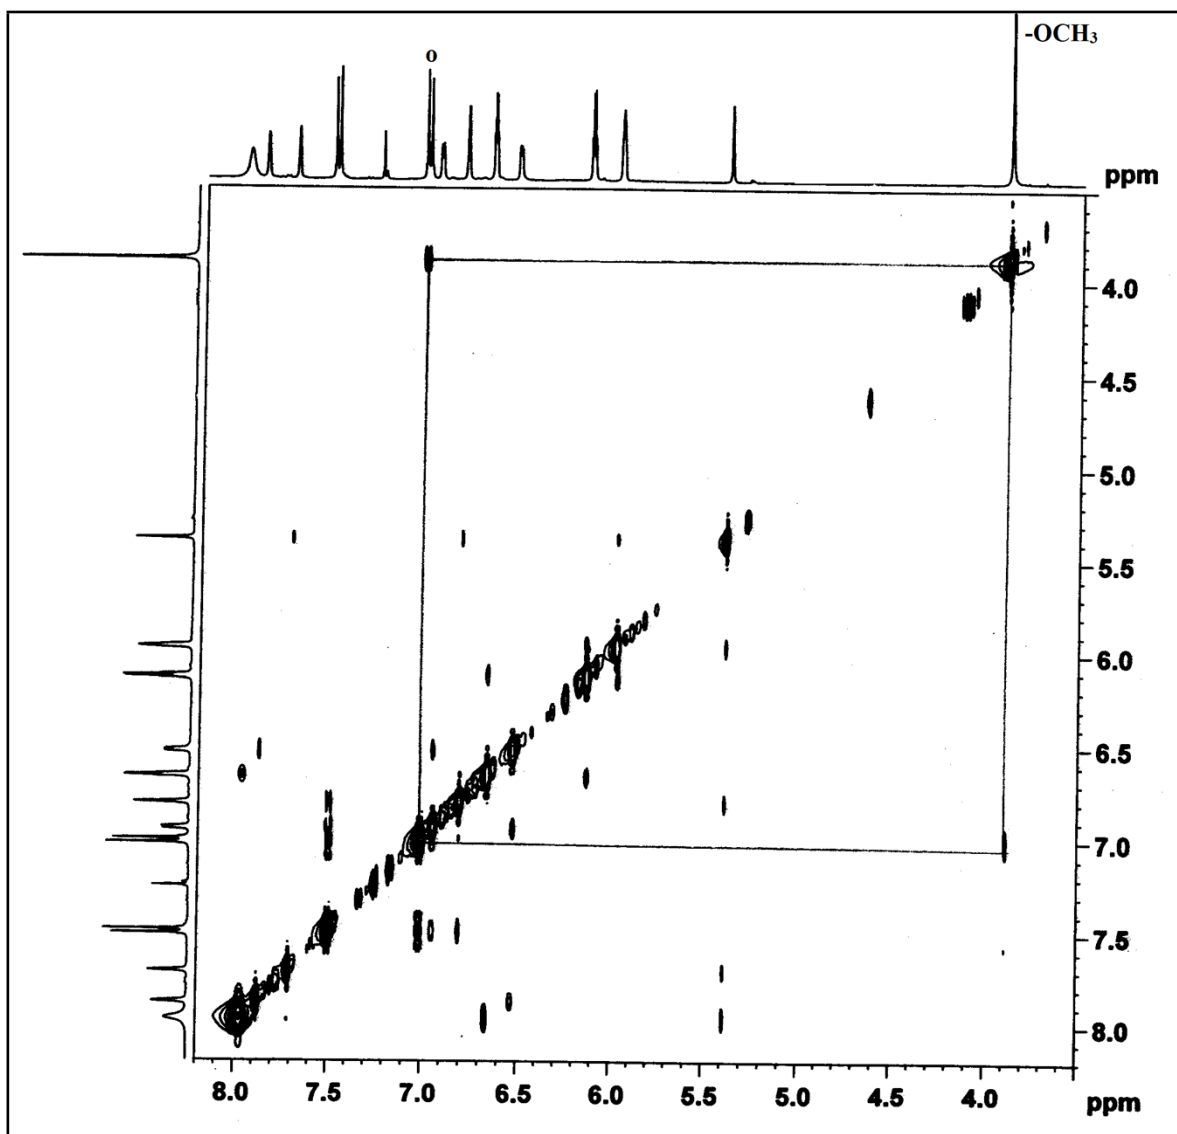

Figure S12:  $^1\text{H}$ - $^1\text{H}$  NOESY spectrum of BODIPY 4 recorded in  $\text{CDCl}_3$ .

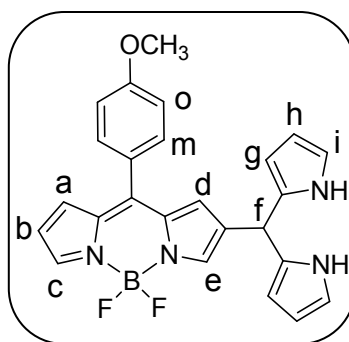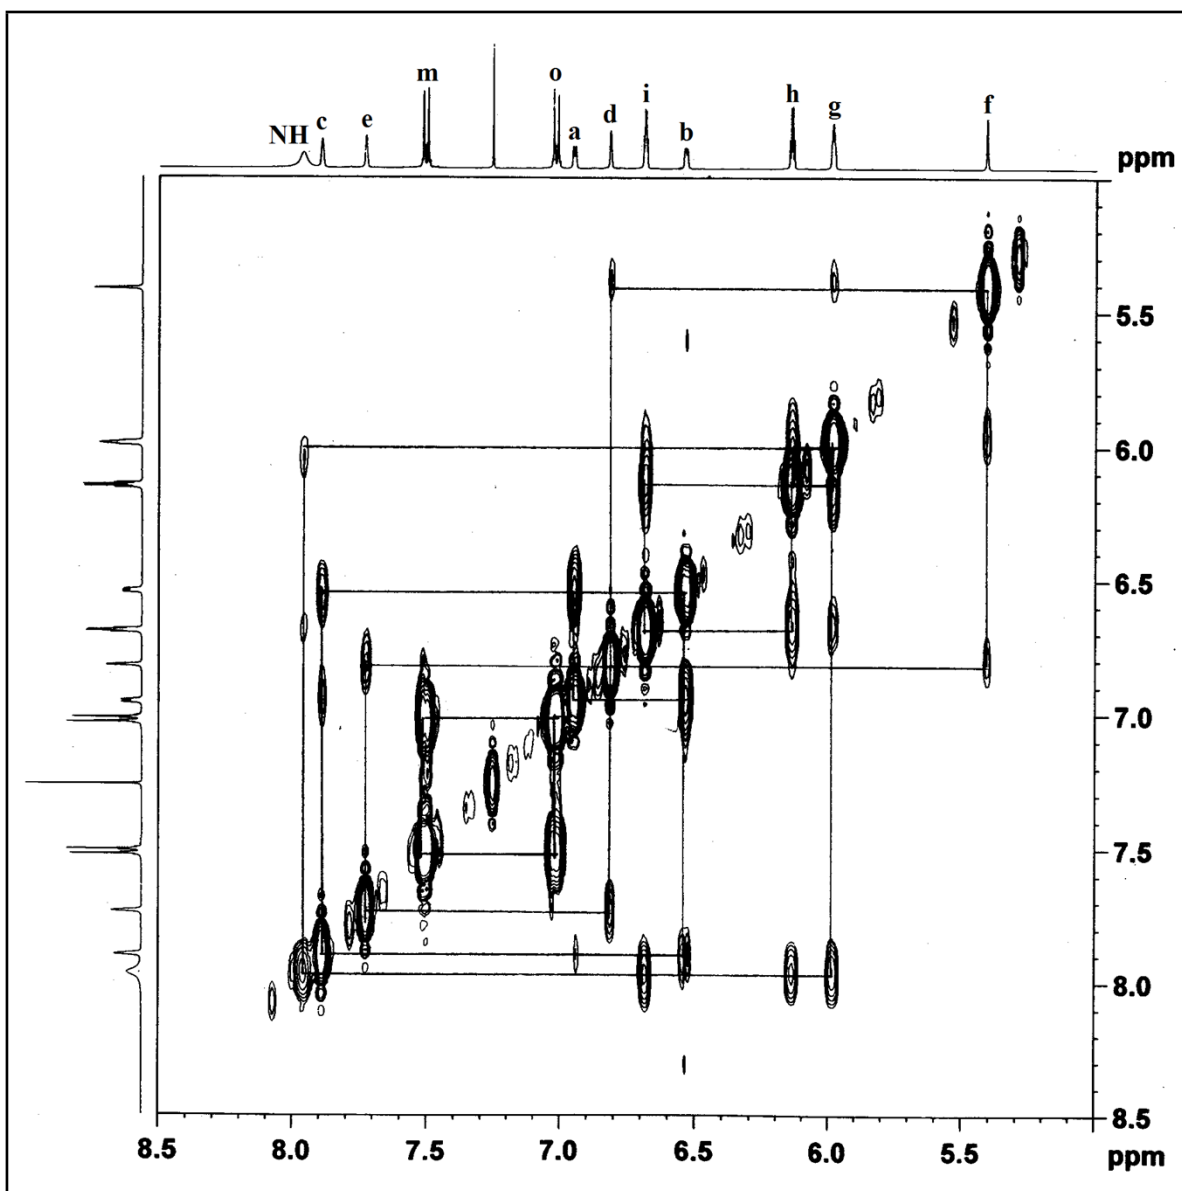

**Figure S13:** Partial  $^1\text{H}$ - $^1\text{H}$  COSY spectrum of BODIPY 4 recorded in  $\text{CDCl}_3$ .

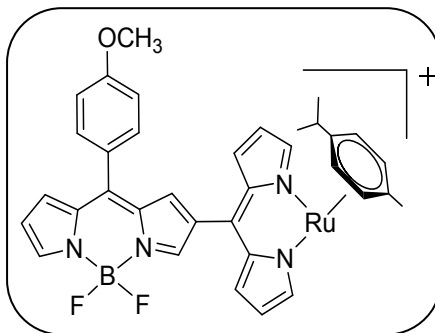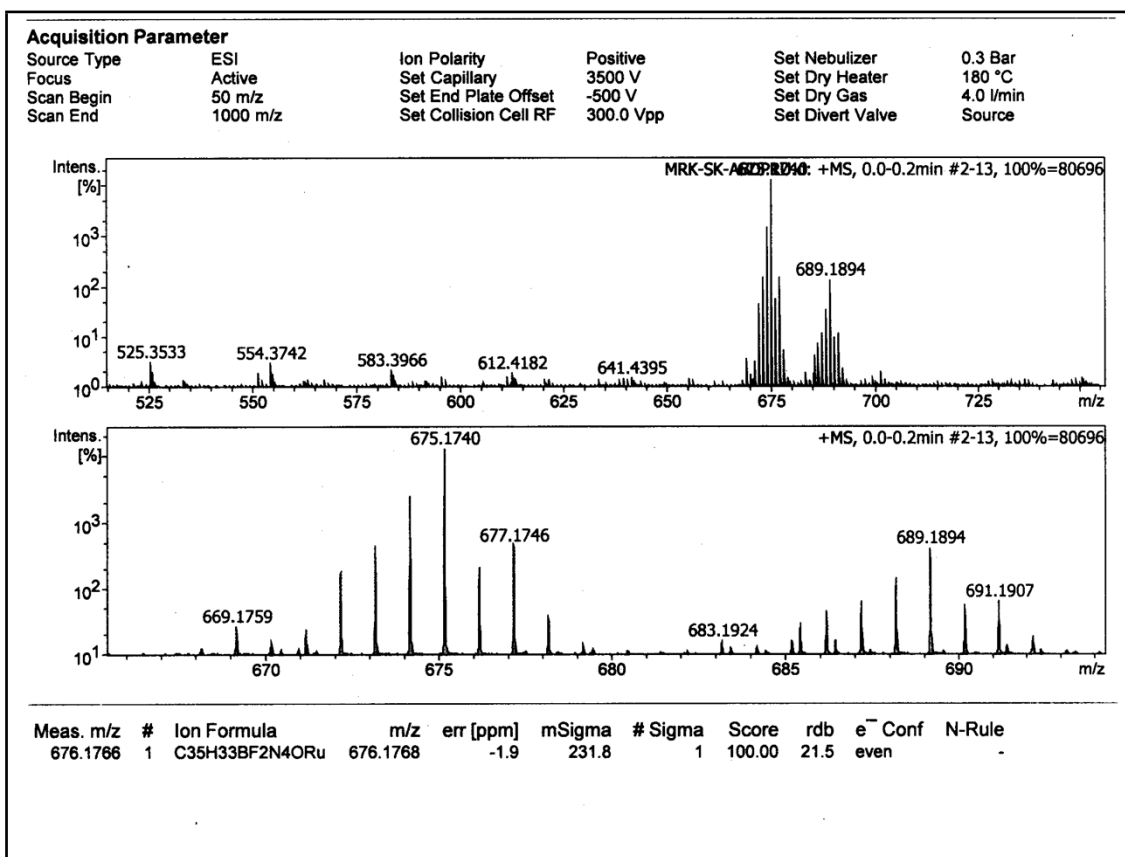

Figure S14: HR mass spectrum of BODIPY 1



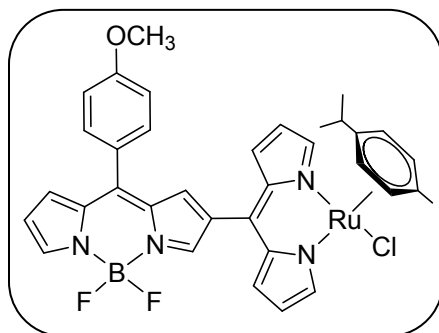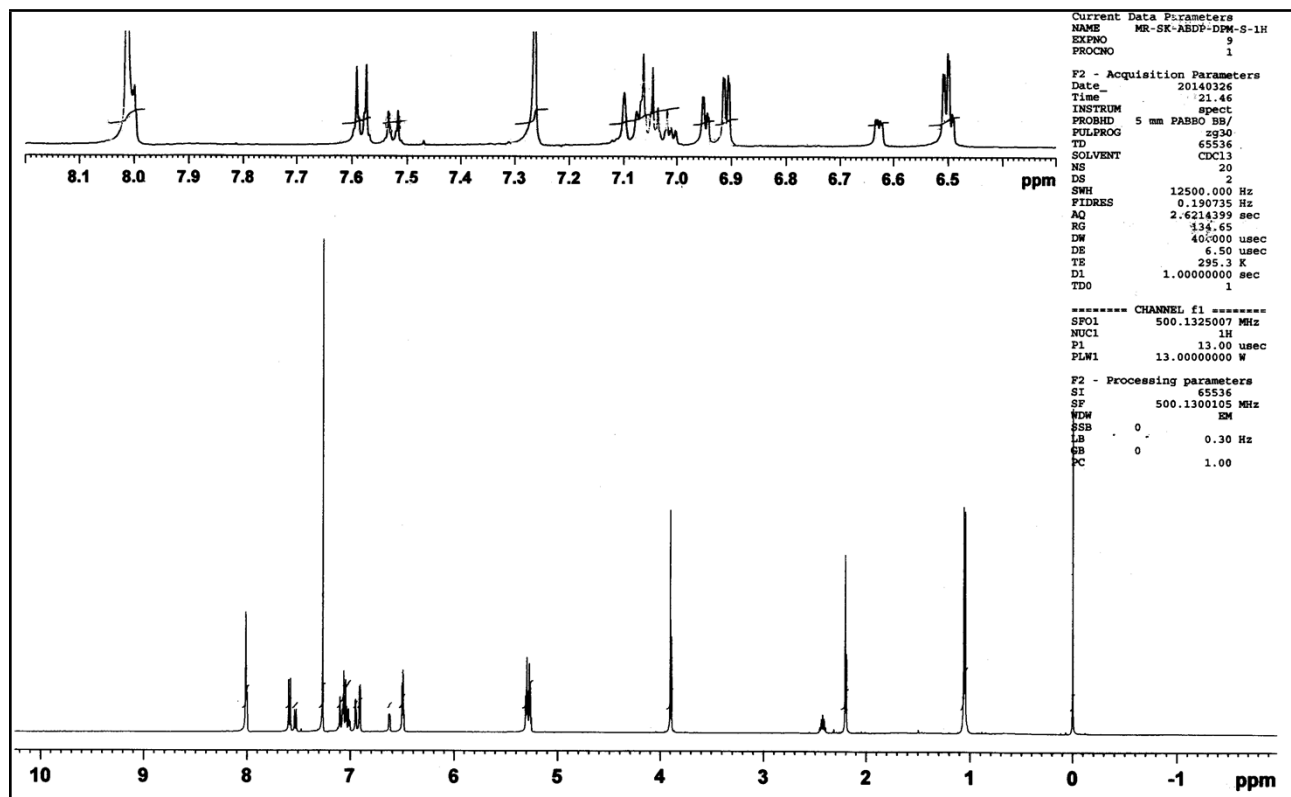

Figure S15:  $^1\text{H}$  NMR spectrum of BODIPY 1 recorded in  $\text{CDCl}_3$

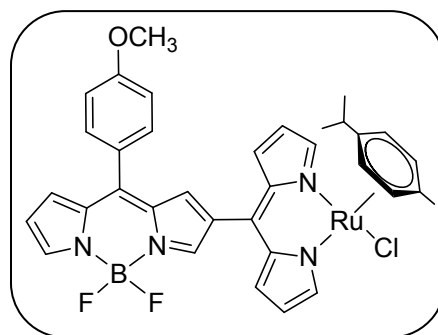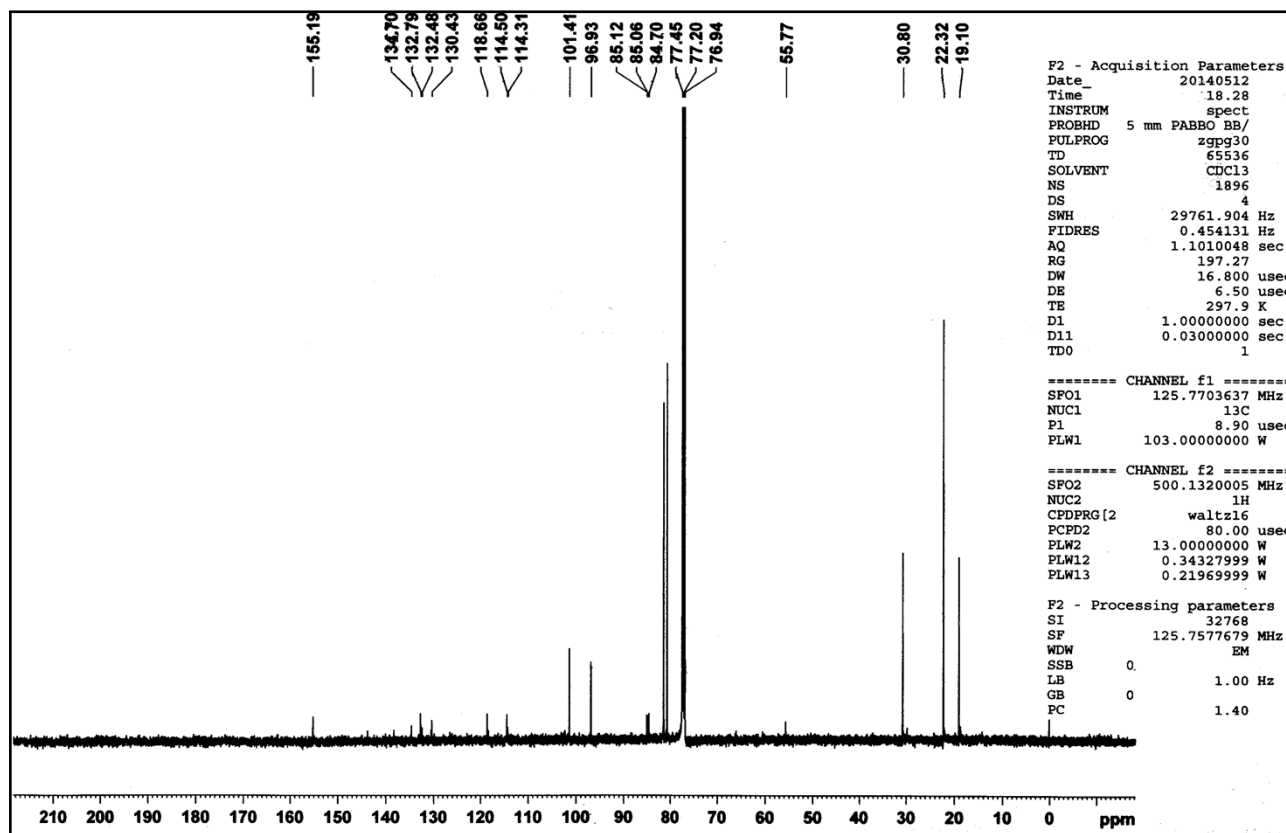

Figure S16:  $^{13}\text{C}$  NMR spectrum of BODIPY 1 recorded in  $\text{CDCl}_3$

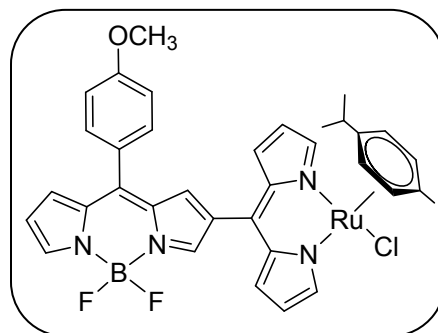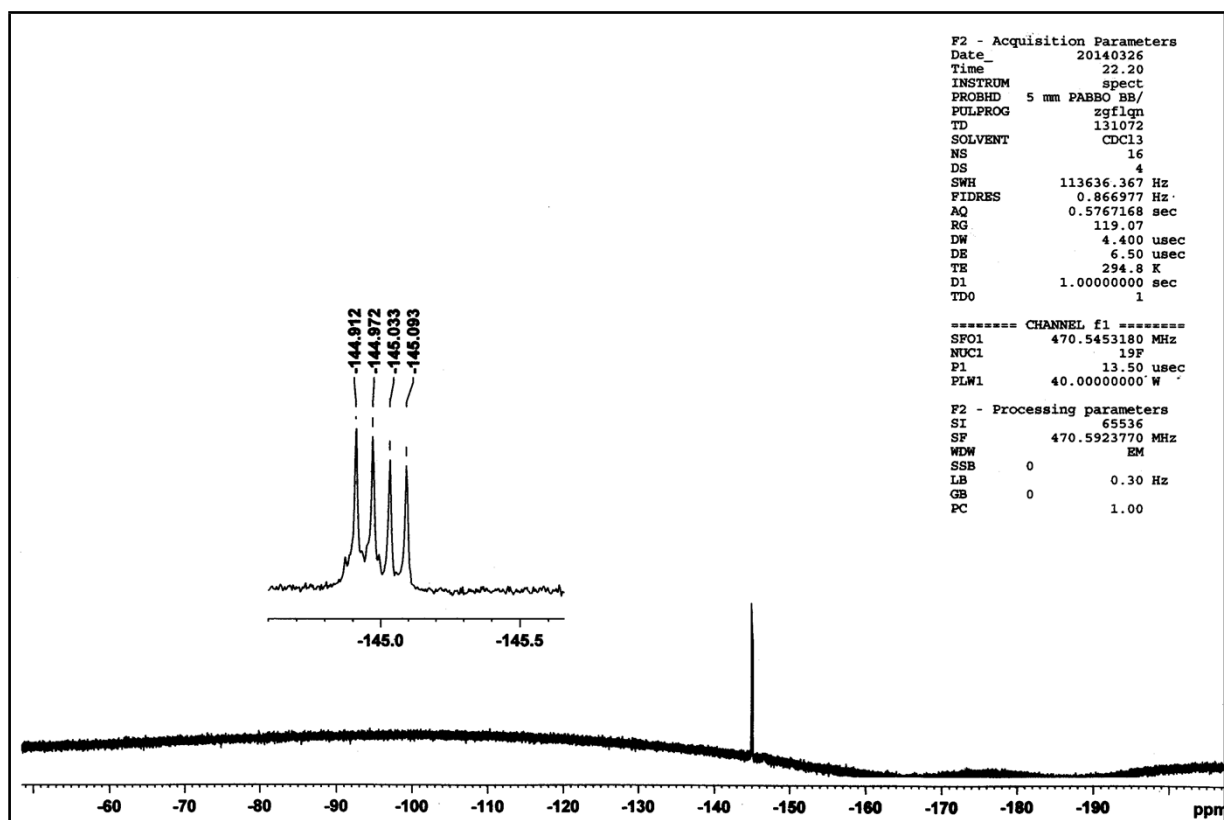

Figure S17:  $^{19}\text{F}$  NMR spectrum of BODIPY 1 recorded in  $\text{CDCl}_3$ . Inset shows the expansion.

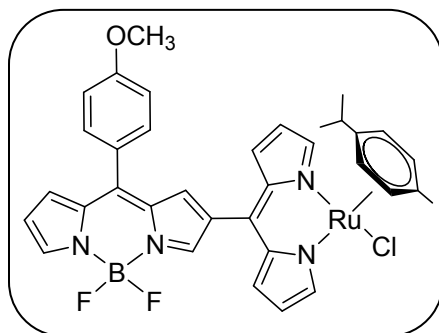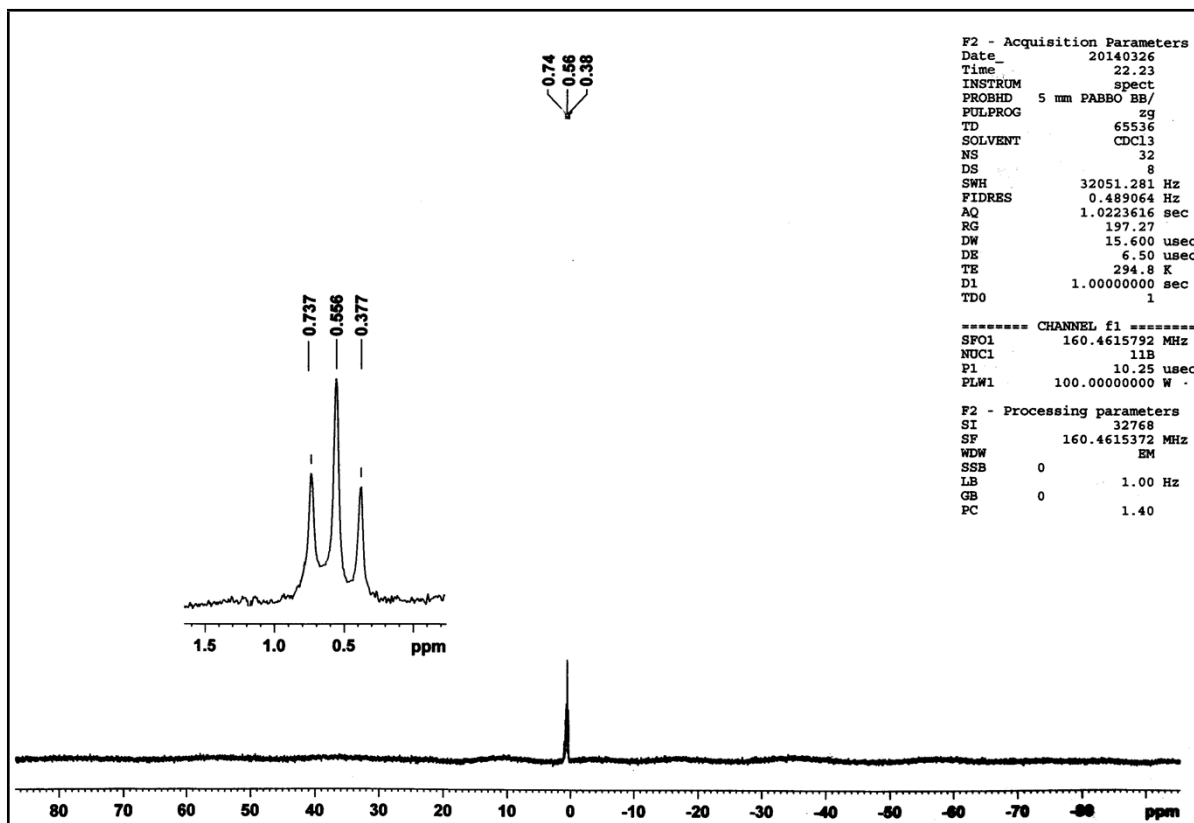

Figure S18:  $^{11}\text{B}$  NMR spectrum of BODIPY **1** recorded in  $\text{CDCl}_3$ . Inset shows the expansion.

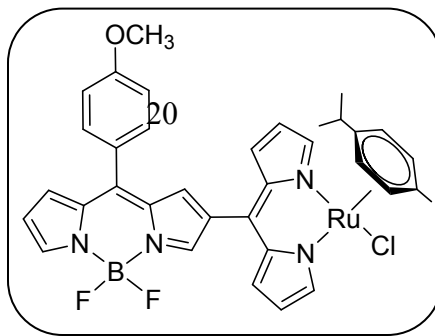

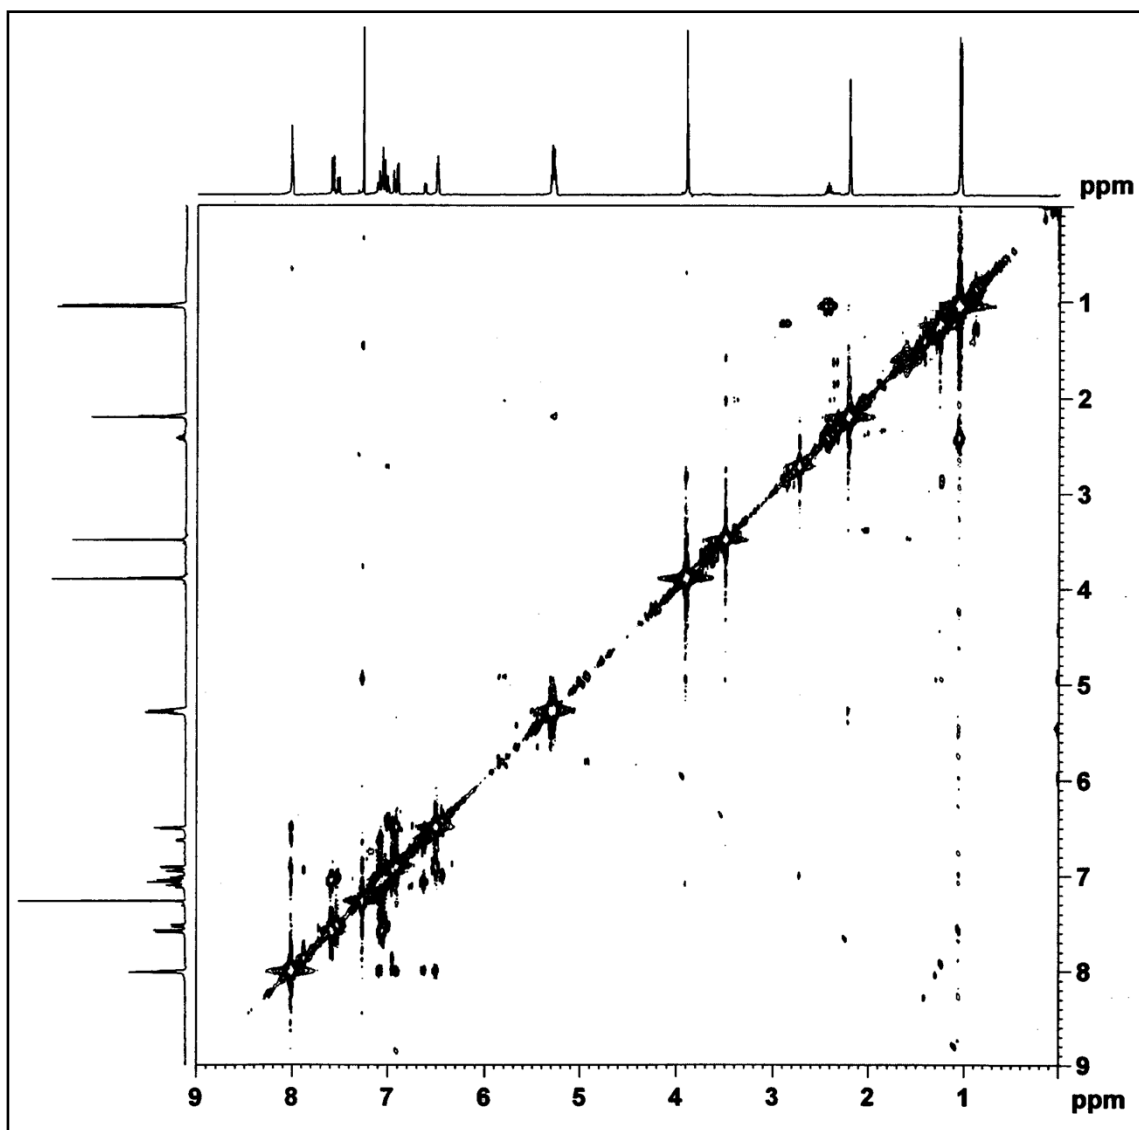

Figure S19:  $^1\text{H}$ - $^1\text{H}$  COSY spectrum of BODIPY 1 recorded in  $\text{CDCl}_3$ .

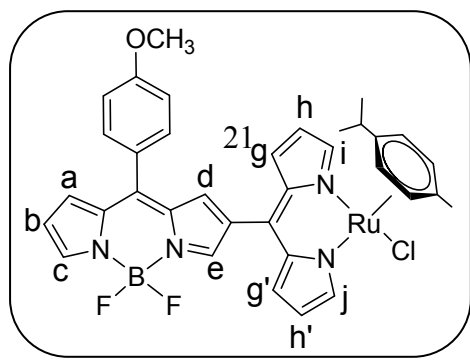

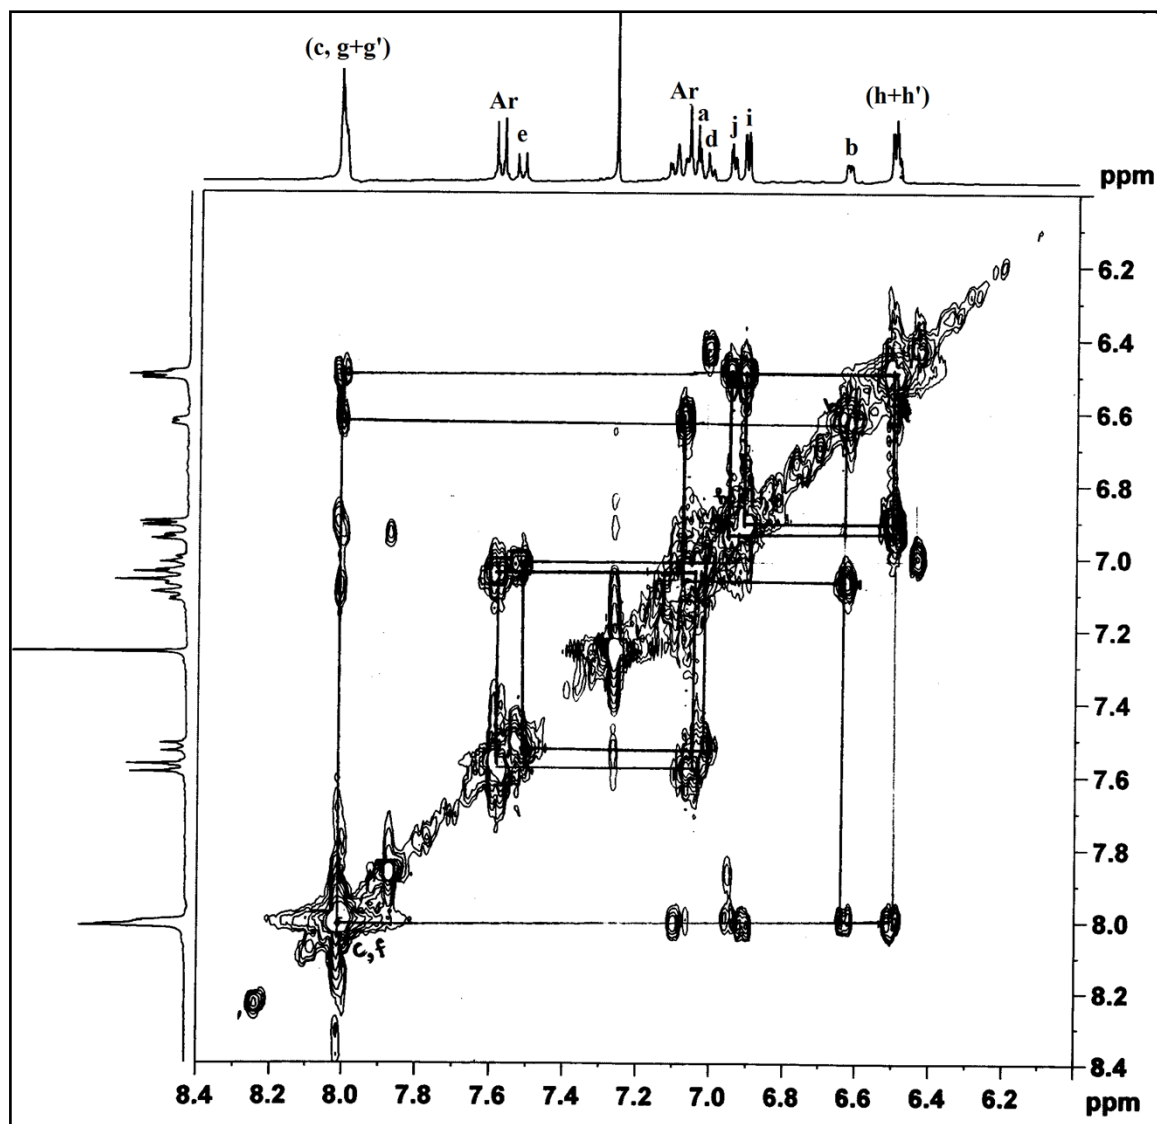

Figure S20: Partial  $^1\text{H}$ - $^1\text{H}$  COSY spectrum of BODIPY 1 recorded in  $\text{CDCl}_3$ .

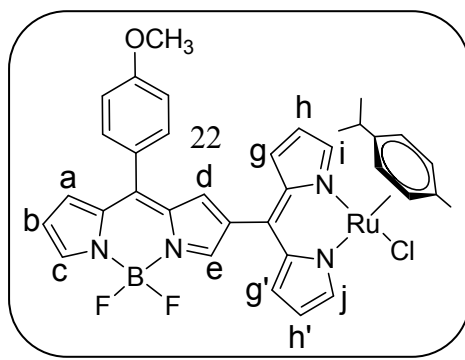

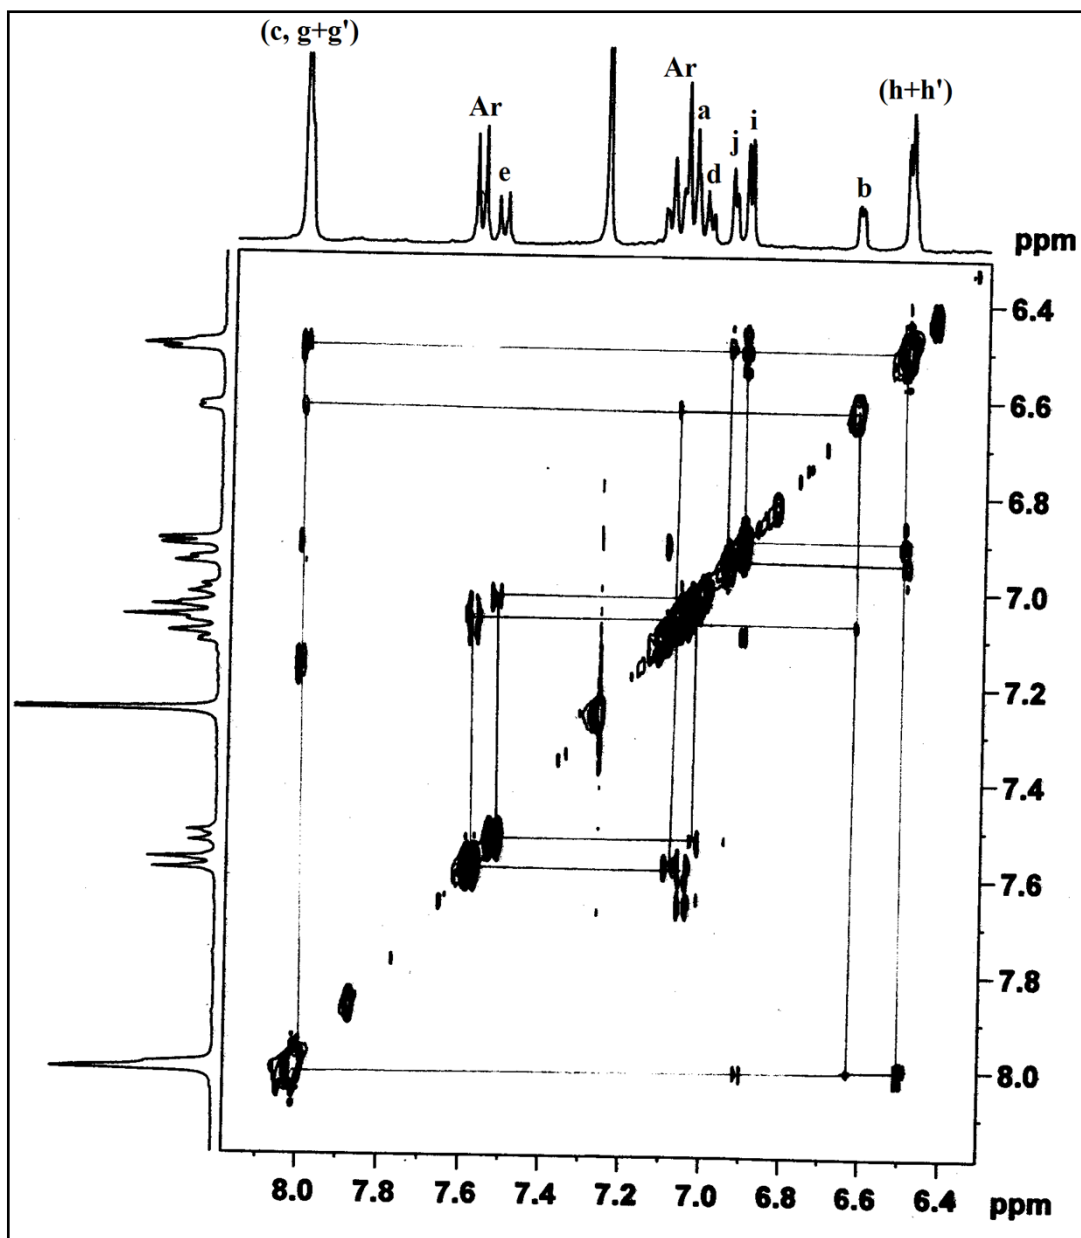

Figure S21: Partial <sup>1</sup>H-<sup>1</sup>H NOESY spectrum of BODIPY 1 recorded in CDCl<sub>3</sub>.

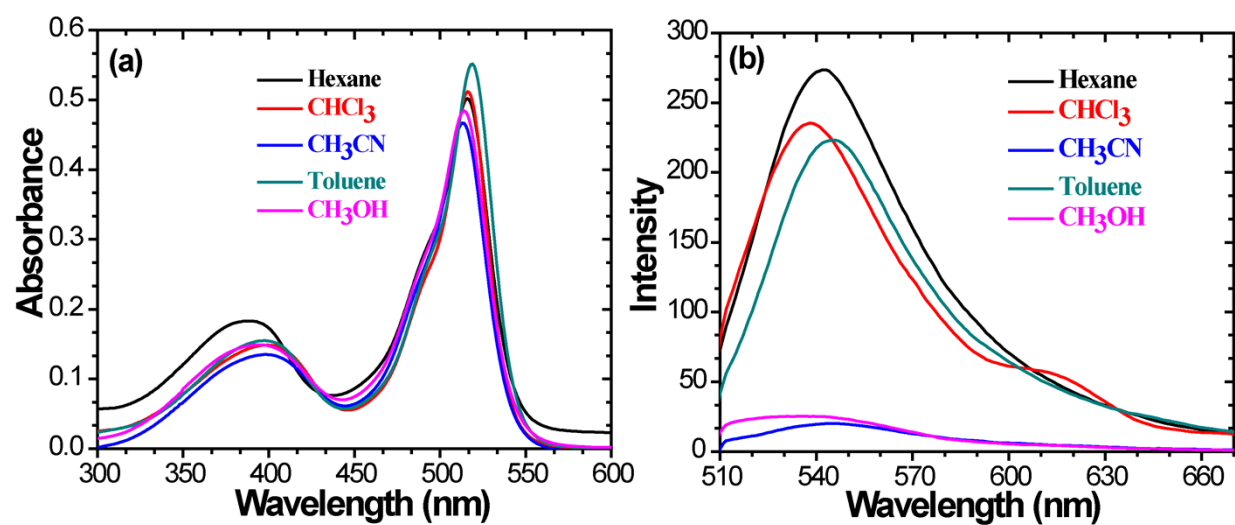

**Figure S22:** a) Absorption, b) emission spectra of BODIPY 4 (5 μM) recorded in different solvents. Excitation wavelength used was 488 nm.



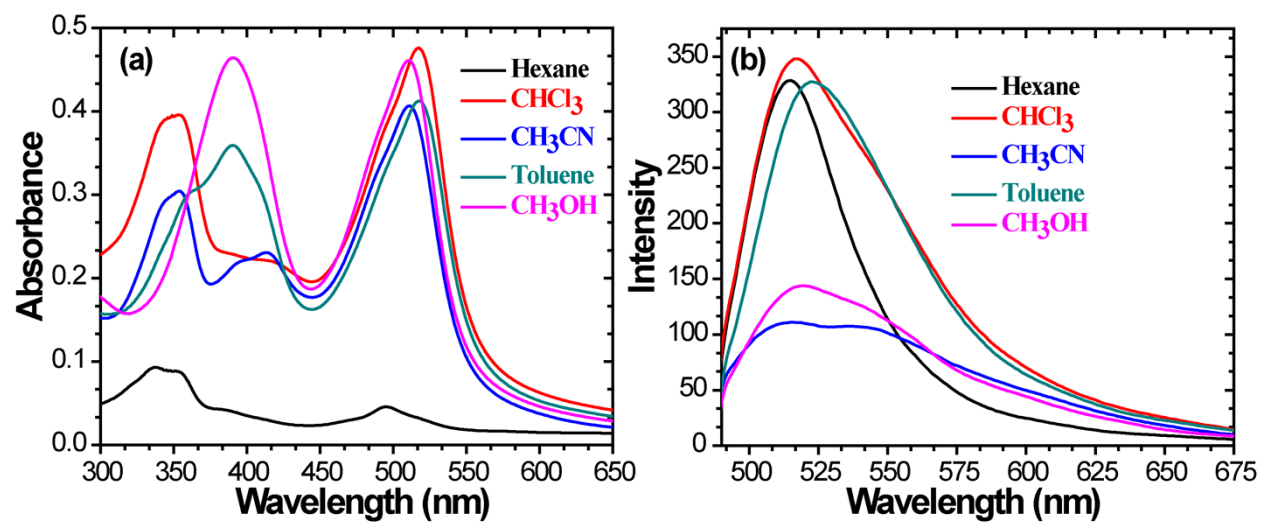

**Figure S23:** a) Absorption, b) emission spectra of BODIPY 1 (5 μM) recorded in different solvents. Excitation wavelength used was 488 nm.

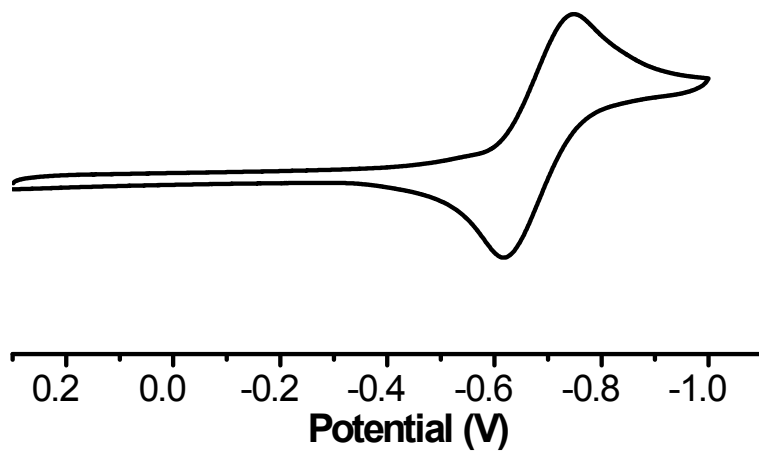

**Figure S24:** Reduction wave of the cyclic voltammogram of BODIPY **4** in dichloromethane containing 0.1 M tetrabutylammonium perchlorate as the supporting electrolyte recorded at a 50 mV s<sup>-1</sup> scan rate.

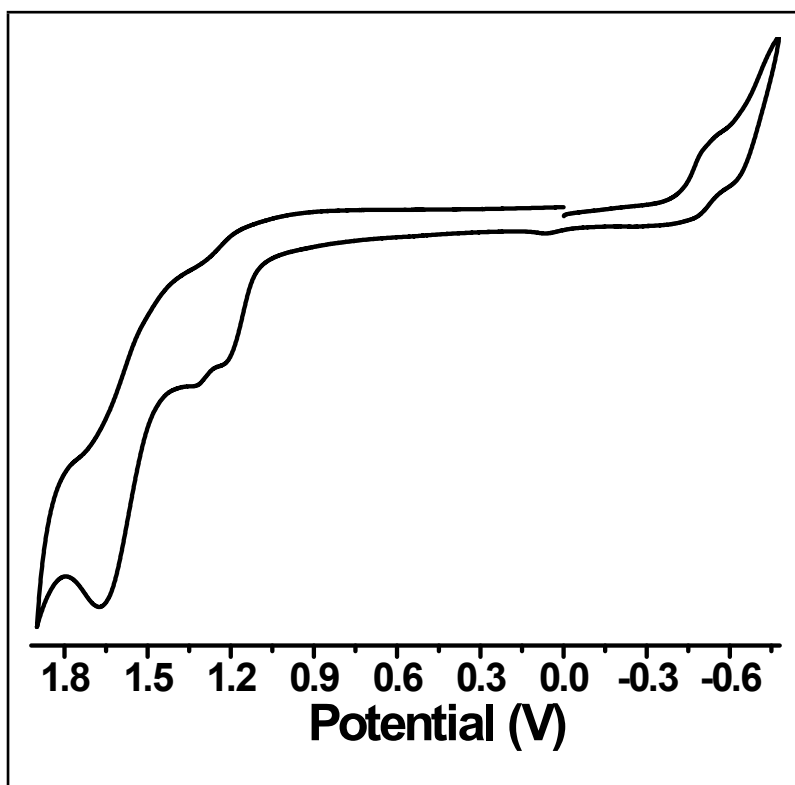

**Figure S25:** Cyclic voltammogram of BODIPY **1** in dichloromethane containing 0.1 M tetrabutylammonium perchlorate as the supporting electrolyte recorded at a 50 mV s<sup>-1</sup> scan rate.

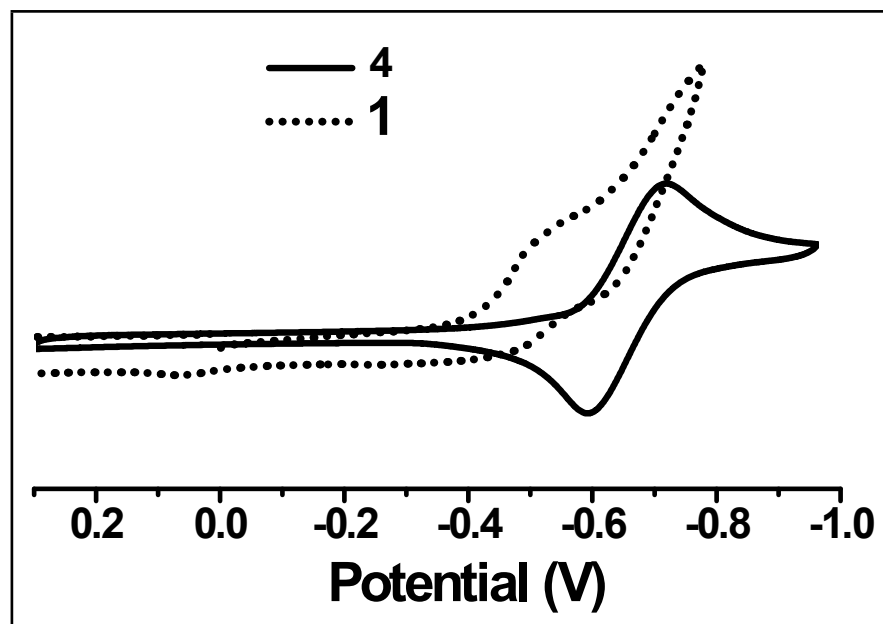

**Figure S26:** Comparison of reduction waves of the cyclic voltammograms of BODIPYs 1 and 4 in dichloromethane containing 0.1 M tetrabutylammonium perchlorate as the supporting electrolyte recorded at a  $50 \text{ mV s}^{-1}$  scan rate.
